# Supplementary material for: T, p-Dependence of intradiffusion in binary fluid mixtures with ammonia as one component
Source: Royal Society of Chemistry journal article supplement (doi:10.1039/b103784f), 2001-01-01
Supplement: tables.doc [file tables.doc]

**Table S1** Intradiffusion coefficients Dii in ammonia/benzene mixtures in 10-9 m2s-1

|  | Dii(C6H6) | | | | | | | | | | Dii(NH3) | | | | | | | | | | |
| --- | --- | --- | --- | --- | --- | --- | --- | --- | --- | --- | --- | --- | --- | --- | --- | --- | --- | --- | --- | --- | --- |
|  | x(C6H6) = 0,044 | | | | | | | | | | | | | | | | | | | | |
|  | p [MPa] | | | | | | | | | | p [MPa] | | | | | | | | | | |
| T [K] | 10 | 20 | | 50 | | 100 | | 150 | | 200 | 10 | | 20 | | 50 | | 100 | | 150 | | 200 |
| 423 | -- | -- | | 18,9 | | 13,9 | | 11,9 | | 10,4 | -- | | -- | | 31,8 | | 24,9 | | 21,1 | | 18,6 |
| 373 | -- | 15,1 | | 12,1 | | 9,86 | | 8,58 | | 7,52 | -- | | 26,2 | | 21,4 | | 17,7 | | 15,3 | | 13,4 |
| 334 | 10,5 | 9,66 | | 8,55 | | 6,92 | | 6,12 | | 5,31 | 17,7 | | 17,1 | | 15,0 | | 12,6 | | 11,0 | | 9,78 |
| 298 | 6,6 | 6,31 | | 5,74 | | 4,83 | | 4,17 | | 3,57 | 11,7 | | 11,3 | | 10,3 | | 8,83 | | 7,68 | | 6,81 |
| 273 | 4,83 | 4,69 | | 4,19 | | 3,48 | | 2,94 | | 2,66 | 8,62 | | 8,36 | | 7,54 | | 6,45 | | 5,58 | | 5,10 |
| 243 | 2,93 | 2,81 | | 2,52 | | 2,11 | | -- | | -- | 5,45 | | 5,26 | | 4,77 | | 4,05 | | -- | | -- |
|  | x(C6H6) = 0,33 | | | | | | | | | | | | | | | | | | | | |
|  | p [MPa] | | | | | | | | | | p [MPa] | | | | | | | | | | |
| T [K] | 10 | 20 | | 50 | | 100 | | 150 | | 190 | 10 | | 20 | | 50 | | 100 | | 150 | | 190 |
| 423 | 20,5 | 18,1 | | 12,7 | | 9,49 | | 7,77 | | 7,11 | 34,7 | | 30,6 | | 22,3 | | 17,7 | | 14,6 | | 13,2 |
| 373 | 11,0 | 10,1 | | 8,17 | | 6,62 | | 5,33 | | 4,72 | 19,5 | | 18,0 | | 15,0 | | 12,1 | | 10,2 | | 9,02 |
| 334 | 6,89 | 6,36 | | 5,35 | | 4,41 | | 3,58 | | 3,22 | 13,2 | | 12,5 | | 10,5 | | 8,79 | | 7,32 | | 6,52 |
| 298 | 4,43 | 4,19 | | 3,49 | | 2,82 | | 2,32 | | 2,02 | 8,65 | | 8,26 | | 7,12 | | 5,95 | | 4,92 | | 4,44 |
| 274 | 3,02 | 2,82 | | 2,3 | | 1,88 | | - | | - | 6,01 | | 5,65 | | 4,83 | | 4,07 | | - | | - |
|  | x(C6H6) = 0,82 | | | | | | | | | | | | | | | | | | | | |
|  | p [MPa] | | | | | | | | | | p [MPa] | | | | | | | | | | |
| T [K] | 10 | | 20 | | 50 | | 100 | | 150 | | | 10 | | 20 | | 50 | | 100 | | 150 | |
| 423 | 10,7 | | 9,70 | | 7,64 | | 5,89 | | 4,69 | | | 20,9 | | 19,2 | | 15,9 | | 12,0 | | 9,62 | |
| 374 | 6,57 | | 6,15 | | 4,97 | | 3,79 | | 3,01 | | | 13,3 | | 12,4 | | 10,3 | | 8,03 | | 6,56 | |
| 333 | 4,27 | | 3,96 | | 3,28 | | 2,47 | | 1,97 | | | 8,86 | | 8,22 | | 6,76 | | 5,35 | | 4,46 | |
| 313 | 3,19 | | 2,94 | | 2,44 | | 1,83 | | 1,43 | | | 6,82 | | 6,44 | | 5,39 | | 4,11 | | 3,42 | |
| 298 | 2,56 | | 2,29 | | 1,95 | | 1,38 | | - | | | 5,63 | | 5,26 | | 4,35 | | 3,21 | | - | |
| 282 | 1,98 | | 1,74 | | 1,51 | | - | | - | | | 4,34 | | 4,10 | | 3,45 | | - | | - | |

**Table S2** Intradiffusion coefficients Dii in ammonia/acetonitrile mixtures in 10-9 m2s-1

|  | **D (CH3CN)** | | | | | | | | | | **D(NH3)** | | | | | | | | | | |
| --- | --- | --- | --- | --- | --- | --- | --- | --- | --- | --- | --- | --- | --- | --- | --- | --- | --- | --- | --- | --- | --- |
|  | **x(CH3CN) = 0,088** | | | | | | | | | | | | | | | | | | | | |
|  | p [MPa] | | | | | | | | | | p [MPa] | | | | | | | | | | |
| T [K] | 10 | 20 | | 50 | | 100 | | 150 | | 200 | 10 | | 20 | | 50 | | 100 | | 150 | | 200 |
| 373 | 18,9 | 16,9 | | 14,5 | | 11,6 | | 10,2 | | 9,20 | 27,3 | | 24,3 | | 20,2 | | 16,6 | | 14,5 | | 12,7 |
| 333 | 12,6 | 11,7 | | 10,4 | | 8,64 | | 7,54 | | 6,68 | 17,7 | | 16,8 | | 14,6 | | 12,4 | | 10,8 | | 9,62 |
| 298 | 8,80 | 8,55 | | 7,49 | | 6,36 | | 5,41 | | 4,92 | 12,1 | | 11,7 | | 10,4 | | 8,78 | | 7,68 | | 6,93 |
| 274 | 6,46 | 6,24 | | 5,48 | | 4,72 | | 4,17 | | 3,73 | 8,91 | | 8,69 | | 7,79 | | 6,72 | | 5,83 | | 5,20 |
| 244 | 4,31 | 4,04 | | 3,61 | | 3,06 | | 2,76 | | 2,47 | 5,73 | | 5,56 | | 5,03 | | 4,27 | | 3,74 | | 3,33 |
| 214 | 2,40 | -- | | 2,03 | | 1,70 | | 1,45 | | 1,31 | 3,27 | | -- | | 2,81 | | 2,38 | | 2,09 | | 1,82 |
|  | **x(CH3CN) = 0,45** | | | | | | | | | | | | | | | | | | | | |
|  | p [MPa] | | | | | | | | | | p [MPa] | | | | | | | | | | |
| T [K] | 10 | 20 | | 50 | | 100 | | 150 | | 200 | 10 | | 20 | | 50 | | 100 | | 150 | | 200 |
| 373 | 13,9 | 12,7 | | 10,7 | | 8,86 | | 7,76 | | 7,04 | 21,4 | | 19,3 | | 16,5 | | 13,5 | | 11,8 | | 10,8 |
| 333 | 9,10 | 8,45 | | 7,73 | | 6,40 | | 5,70 | | 5,06 | 13,7 | | 12,8 | | 11,5 | | 9,88 | | 8,53 | | 7,63 |
| 298 | 6,38 | 6,06 | | 5,52 | | 4,76 | | 4,13 | | 3,61 | 9,81 | | 9,30 | | 8,23 | | 6,95 | | 6,09 | | 5,49 |
| 274 | 4,82 | 4,59 | | 4,22 | | 3,61 | | 3,10 | | 2,70 | 7,50 | | 7,09 | | 6,32 | | 5,32 | | 4,59 | | 4,11 |
| 243 | 3,05 | 2,93 | | 2,62 | | 2,22 | | 1,92 | | 1,66 | 4,55 | | -- | | 3,92 | | 3,33 | | 2,86 | | 2,55 |
| 214 | 1,76 | -- | | 1,47 | | 1,23 | | 1,03 | | 0,85 | 2,62 | | -- | | 2,24 | | 1,86 | | 1,58 | | 1,34 |
|  | **x(CH3CN) = 0,89** | | | | | | | | | | | | | | | | | | | | |
|  | p [MPa] | | | | | | | | | | p [MPa] | | | | | | | | | | |
| T [K] | 10 | | 50 | | 100 | | 150 | | 200 | | | 10 | | 50 | | 100 | | 150 | | 200 | |
| 373 | 9,68 | | 7,97 | | 6,62 | | 5,77 | | 5,14 | | | 17,1 | | 12,9 | | -- | | -- | | -- | |
| 333 | 6,73 | | 5,70 | | 4,85 | | 4,18 | | 3,70 | | | 10,9 | | 9,12 | | -- | | -- | | -- | |
| 298 | 4,55 | | 3,89 | | 3,31 | | 2,89 | | 2,56 | | | 7,93 | | 6,46 | | -- | | -- | | -- | |
| 273 | 3,41 | | 2,87 | | 2,42 | | 2,09 | | 1,80 | | | 5,86 | | 4,85 | | -- | | -- | | -- | |

**Table S3** Intradiffusion coefficients Dii in ammonia/pentanol mixtures in 10-9 m2s-1

|  | **Dii(CH3OH)** | | | | | | | | | | **Dii(NH3)** | | | | | | | | | | |
| --- | --- | --- | --- | --- | --- | --- | --- | --- | --- | --- | --- | --- | --- | --- | --- | --- | --- | --- | --- | --- | --- |
|  | **x(CH3OH) = 0,008** | | | | | | | | | | | | | | | | | | | | |
|  | p [MPa] | | | | | | | | | | p [MPa] | | | | | | | | | | |
| T [K] | 10 | | 50 | | 100 | | 150 | | 200 | | | 10 | | 50 | | 100 | | 150 | | 200 | |
| 373 | 18,0 | | 13,0 | | 10,9 | | 9,18 | | 8,50 | | | 28,3 | | 20,7 | | 17,2 | | 15,0 | | 1,32 | |
| 333 | 10,4 | | 9,32 | | 8,04 | | 7,05 | | 6,32 | | | 15,8 | | 14,1 | | 12,6 | | 10,8 | | 9,51 | |
| 298 | 6,94 | | 5,85 | | 4,97 | | 4,38 | | 4,04 | | | 10,8 | | 9,38 | | 8,06 | | 7,03 | | 6,34 | |
| 274 | 5,06 | | 4,43 | | 3,74 | | 3,31 | | 3,01 | | | 8,05 | | 6,77 | | 6,19 | | 5,24 | | 4,67 | |
| 244 | 3,21 | | 2,77 | | 2,39 | | 2,00 | | 1,79 | | | 4,90 | | 4,28 | | 3,74 | | 3,29 | | 2,89 | |
| 214 | 1,68 | | 1,35 | | 1,11 | | 0,937 | | 0,841 | | | 2,62 | | 2,25 | | 1,92 | | 1,60 | | 1,39 | |
|  | **x(CH3OH) = 0,08** | | | | | | | | | | | | | | | | | | | | |
|  | p [MPa] | | | | | | | | | | p [MPa] | | | | | | | | | | |
| T [K] | 10 | 20 | | 50 | | 100 | | 150 | | 200 | 10 | | 20 | | 50 | | 100 | | 150 | | 200 |
| 423 | -- | 29,1 | | 20,7 | | 15,6 | | 14,2 | | 12,4 | -- | | 44,7 | | 30,2 | | 22,1 | | 20,1 | | 17,7 |
| 373 | 17,3 | 15,8 | | 13,8 | | 10,6 | | 9,39 | | 8,77 | 24,8 | | 23,0 | | 19,4 | | 16,0 | | 14,0 | | 12,5 |
| 334 | 10,3 | 10,1 | | 8,87 | | 7,52 | | 6,59 | | 5,93 | 16,1 | | 15,3 | | 13,4 | | 11,3 | | 9,99 | | 8,82 |
| 298 | 6,99 | 6,71 | | 5,95 | | 5,12 | | 4,38 | | 3,98 | 10,5 | | 10,1 | | 9,04 | | 7,72 | | 6,76 | | 6,10 |
| 273 | 4,72 | 4,56 | | 4,13 | | 3,51 | | 3,09 | | 2,70 | 7,40 | | 7,12 | | 6,43 | | 5,53 | | 4,93 | | 4,38 |
| 243 | 2,84 | 2,75 | | 2,53 | | 2,23 | | 1,93 | | 1,71 | 4,56 | | 4,37 | | 3,99 | | 3,44 | | 3,07 | | 2,66 |
|  | **x(CH3OH) = 0,24** | | | | | | | | | | | | | | | | | | | | |
|  | p [MPa] | | | | | | | | | | p [MPa] | | | | | | | | | | |
| T [K] | 10 | 20 | | 50 | | 100 | | 150 | | 200 | 10 | | 20 | | 50 | | 100 | | 150 | | 200 |
| 423 | -- | 20,9 | | 16,8 | | 13,3 | | 11,6 | | 10,0 | -- | | 27,4 | | 22,3 | | 18,1 | | 15,5 | | 13,9 |
| 373 | 13,3 | 12,0 | | 10,3 | | 8,49 | | 7,43 | | 6,29 | 18,0 | | 16,4 | | 13,9 | | 11,7 | | 10,3 | | 9,19 |
| 334 | 7,98 | 7,43 | | 6,54 | | 5,71 | | 5,09 | | 4,64 | 11,1 | | 10,3 | | 8,99 | | 8,02 | | 7,42 | | 6,61 |
| 298 | 5,03 | 4,58 | | 4,17 | | 3,58 | | 3,22 | | 2,85 | -- | | -- | | -- | | -- | | -- | | -- |
| 273 | 3,48 | 3,16 | | 2,88 | | 2,50 | | 2,16 | | 1,99 | -- | | -- | | -- | | -- | | -- | | -- |
| 243 | 1,83 | 1,77 | | 1,59 | | 1,43 | | 1,20 | | 0,967 | -- | | -- | | -- | | -- | | -- | | -- |
| 213 | 0,856 | 0,816 | | 0,740 | | 0,576 | | 0,482 | | 0,421 | -- | | -- | | -- | | -- | | -- | | -- |

For x(CH3OH) > 0,24 Dii(CH3OH) only could be measured,since the T2 relaxation time of the coalesced signals of the NH-protons of A and the OH-protons of the hydroxyl group of M decreased caused by the rapid chemical exchange. The rate of this exchange increases rapidly with increasing concentration of M.

|  | **x(CH3OH) = 0,44** | | | | |  | **x(CH3OH) = 0,70** | | | | |
| --- | --- | --- | --- | --- | --- | --- | --- | --- | --- | --- | --- |
|  | p [MPa] | | | | |  | p [MPa] | | | | |
| T [K] | 10 | 50 | 100 | 150 | 200 | T / K | 10 | 50 | 100 | 150 | 200 |
| 423 | 19,1 | 15,1 | 12,9 | 10,7 | 9,86 | 423 | 15,2 | 12,1 | 9,90 | 8,71 | 7,22 |
| 373 | 11,3 | 9,25 | 7,88 | 7,12 | 6,22 | 373 | 8,64 | 6,98 | 5,92 | 5,31 | 4,81 |
| 333 | 6,66 | 5,68 | 4,85 | 4,25 | 3,78 | 333 | 5,05 | 4,24 | 3,52 | 3,04 | 2,72 |
| 295 | 3,71 | 3,14 | 2,70 | 2,38 | 2,08 | 298 | 2,76 | 2,35 | 1,98 | 1,70 | 1,50 |
| 273 | 2,38 | 2,09 | 1,72 | 1,49 | 1,29 | 274 | 1,63 | 1,41 | 1,17 | 1,02 | 0,897 |
| 243 | 1,24 | 1,02 | 0,852 | 0,713 | 0,603 | 243 | 0,745 | 0,602 | 0,494 | 0,424 | 0,350 |
| 228 | 0,748 | 0,618 | 0,488 | 0,398 | 0,328 | 228 | 0,438 | 0,349 | 0,278 | 0,220 | 0,178 |
| 213 | 0,45 | 0,371 | 0,287 | 0,228 | 0,179 | 214 | 0,241 | 0,184 | 0,134 | 0,102 | 0,076 |
| 194 | 0,19 | 0,14 | 0,11 | -- | -- | 193 | 0,065 | 0,045 | 0,030 | 0,021 | -- |
|  | **x(CH3OH) = 0,85** | | | | |  | **x(CH3OH) = 0,96** | | | | |
|  | p [MPa] | | | | |  | p [MPa] | | | | |
| T [K] | 10 | 50 | 100 | 150 | 200 | T / K | 10 | 50 | 100 | 150 | 200 |
| 423 | 13,94 | 11,0 | 9,30 | 8,19 | 7,19 | 405 | 9,98 | 8,38 | 7,15 | 6,24 | 5,63 |
| 374 | 7,81 | 6,43 | 5,41 | 4,77 | 4,31 | 374 | 6,47 | 5,45 | 4,76 | 4,37 | 4,09 |
| 334 | 4,3 | 3,68 | 3,22 | 2,78 | 2,5 | 333 | 4,14 | 3,46 | 2,98 | 2,68 | 2,38 |
| 298 | 2,45 | 2,06 | 1,78 | 1,59 | 1,4 | 298 | 2,25 | 1,98 | 1,73 | 1,55 | 1,36 |
| 273 | 1,45 | 1,25 | 1,07 | 0,923 | 0,819 | 273 | 1,40 | 1,27 | 1,06 | 0,924 | 0,826 |
| 243 | 0,687 | 0,613 | 0,518 | 0,427 | 0,357 | 240 | 0,660 | 0,578 | 0,484 | 0,416 | 0,359 |
| 228 | 0,44 | 0,363 | 0,296 | 0,244 | 0,204 | 214 | 0,308 | 0,247 | 0,204 | 0,168 | 0,136 |
| 213 | 0,242 | 0,199 | 0,155 | 0,120 | 0,096 | 201 | 0,177 | 0,148 | 0,116 | 0,095 | 0,079 |
| 194,5 | 0,100 | 0,075 | 0,055 | 0,039 | 0,028 | -- | -- | -- | -- | -- | -- |

**Table S4** Intradiffusion coefficients Dii in ammonia/methanol mixtures in 10-9 m2s-1

|  | **x(CH3OH) = 0,75** | |  | **x(CH3OH) = 0,82** | |  | | **x(CH3OH) = 0,92** | | |
| --- | --- | --- | --- | --- | --- | --- | --- | --- | --- | --- |
| T [K] | Dii(CH3OH) | Dii(NH3) | T [K] | Dii(CH3OH) | Dii(NH3) | | T [K] | Dii(CH3OH) | | Dii(NH3) |
| 297 | 2,59 | 3,18 | 299 | 2,65 | 2,97 | | 299 | 2,48 | | 2,28 |
| 274 | 1,65 | 1,80 | 273 | 1,59 | 1,70 | | 274 | 1,59 | | 1,60 |
| 243 | 0,76 | 0,80 | 243 | 0,79 | 0,83 | | 242 | 0,83 | 0,81 | |
| 210 | 0,23 | 0,22 | 212 | 0,29 | 0,28 | | 212 | 0,34 | | 0,31 |

**Table S5** Intradiffusion coefficients Dii at saturation vapor pressure in N-15 ammonia/methanol mixtures in 10-9 m2s-1

|  | **Dii(C5H11OH)** | | | | | **Dii(NH3)** | | | | |
| --- | --- | --- | --- | --- | --- | --- | --- | --- | --- | --- |
|  | **x(C5H11OH) = 0,032** | | | | | | | | | |
|  | p [MPa] | | | | | p [MPa] | | | | |
| T [K] | 10 | 50 | 100 | 150 | 200 | 10 | 50 | 100 | 150 | 200 |
| 373 | 11,3 | 8,54 | 7,19 | 6,17 | 5,33 | 24,1 | 18,5 | 15,2 | 13,1 | 15,2 |
| 333 | 7,23 | 5,91 | 4,87 | 4,24 | 3,70 | 15,7 | 13,0 | 10,9 | 9,53 | 10,9 |
| 298 | 4,48 | 3,84 | 3,18 | 2,71 | 2,35 | 10,1 | 8,59 | 7,12 | 6,31 | 7,12 |
| 274 | 3,20 | 2,78 | 2,28 | 1,93 | 1,64 | -- | -- | -- | -- | -- |
| 243 | 1,78 | 1,50 | 1,26 | 1,06 | 0,91 | 4,48 | 3,94 | 3,35 | 2,89 | 3,35 |
